# Supplementary material
Source: ML conference proceedings conference paper supplement (https://openreview.net/forum?id=f-LuEgBQUg)
Supplement: supplementary_material [file attachment]

# SUPPLEMENTARY MATERIAL OF LANGUAGE-DRIVEN IMAGE STYLE TRANSFER

**Anonymous authors**

Paper under double-blind review

## A USED DATASET ON LDIST

We build a dataset to evaluate language-based image style transfer (LDIST). As shown in Fig. 1, we collect 14,924 wallpapers from WallpapersCraft as content images ( $\mathcal{C}$ ), including diverse scenes like *building*, *animal*, or *island*. We apply DTD<sup>2</sup> (Wu et al., 2020) that provides 5,368 pairs of texture image ( $\mathcal{S}$ ) and textual description ( $\mathcal{X}$ ) as reference styles, such as *striped*, *smear*, or *paisley*.

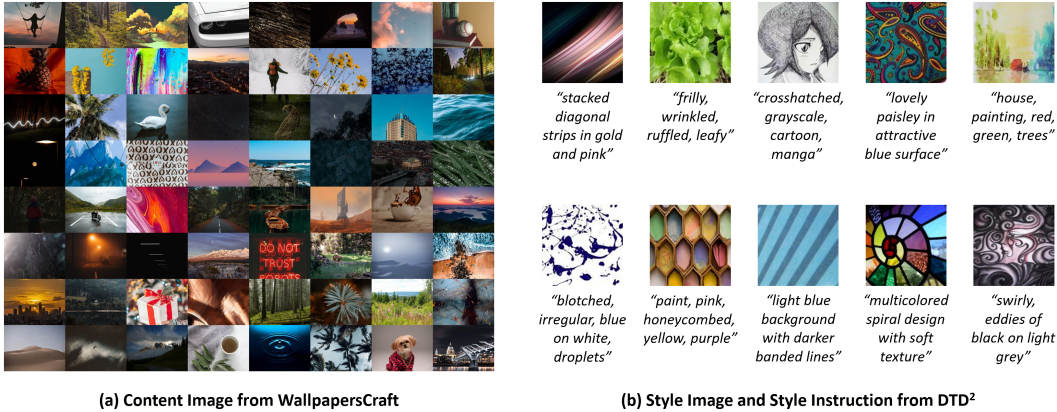

Figure 1: The used dataset is built upon content images and reference styles.

## B RETRIEVAL-BASED BASELINE

Apart from generating the transferred result ( $\hat{\mathcal{O}}$ ) directly by the style instruction ( $\mathcal{X}$ ), we also investigate a two-step retrieval-based baseline. Firstly, we search the related style image ( $\mathcal{S}$ ) via  $\mathcal{X}$  and then perform the standard style transfer from both. We adopt the learned BERT encoder from DTD<sup>2</sup> (Wu et al., 2020) for the text-image retrieval with *MAP* 13.5, *R@5* 5.2, and *R@20* 17.3. Table 1 shows that the two-step baseline performs slightly better than our CLVA on automatic metrics. However, this retrieval-based method still relies on the existing collections of style images and may limit the diversity of style patterns due to the collection size.

| Method    | Automatic Metrics (vs. Semi-GT) |                          |                      |                    |                   |
|-----------|---------------------------------|--------------------------|----------------------|--------------------|-------------------|
|           | SSIM ( $\uparrow$ )             | Percept ( $\downarrow$ ) | FAD ( $\downarrow$ ) | VLS ( $\uparrow$ ) | RS ( $\uparrow$ ) |
| CLVA      | 60.586                          | 0.02076                  | <b>0.11318</b>       | 22.785             | 98.798            |
| Retrieval | <b>60.745</b>                   | <b>0.02059</b>           | 0.11931              | <b>22.942</b>      | <b>98.942</b>     |

Table 1: Testing results of the two-step retrieval-based baseline.

## C HUMAN EVALUATION

We investigate the quality of LDIST results from the human aspect through Amazon Mechanical Turk (AMT). Fig. 2 illustrates the screenshots of the human ranking task. MTurkers rank the cor-

relation of the LDIST result from each method between the style instruction (vs. Instruction) or the style image (vs. Style). Each MTurker rewards \$1.0 and takes a mean of 17 minutes for 6 tasks.

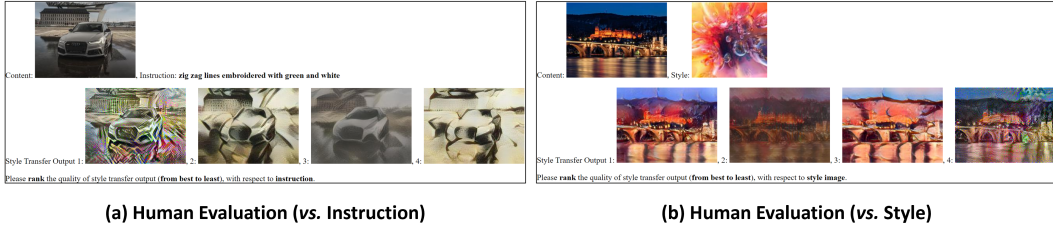

Figure 2: The screenshots of the human ranking task for evaluating the quality of LDIST results.

## D PHOTOREALISTIC LDIST

In this paper, we focus on *artistic* style transfer, which manipulates colors and textures of a content image. Ideally, our CLVA can also support *photorealistic* LDIST by replacing style instructions  $\mathcal{X}$  with photorealistic instructions. However, there is a practical issue where the caption is not detailed enough to represent itself *visual concept*. For example, from the ARTEMIS dataset (Achlioptas et al., 2021), descriptions are usually too abstract to provide explicit style patterns. Therefore, we leave the collection of *photorealistic* style instructions and *photorealistic* LDIST as a future work.

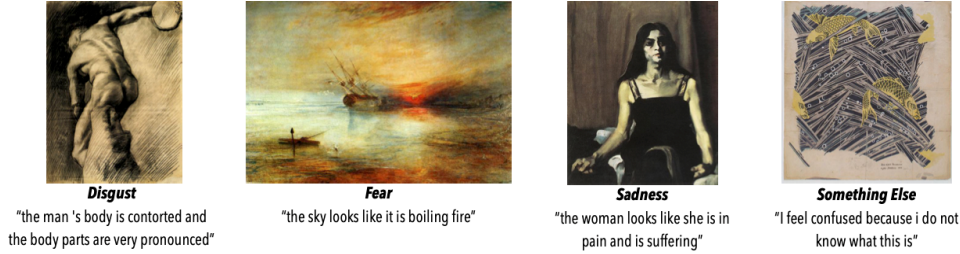

Figure 3: The description of natural image is too abstract to support *photorealistic* LDIST.

## E ETHICS DISCUSSION

Though our work benefits creative visual applications, there may be a "fake as real" doubt for those manipulated images. To mitigate this issue, we can apply techniques from image forensics (Wang et al., 2020; Huh et al., 2018; Frank et al., 2020) to detect the authenticity of an image. Regarding guided instructions, for example, hate speech detection (Aluru et al., 2020; Huang et al., 2020; Samghabadi et al., 2020; Samanta et al., 2019) can help to filter out malicious texts and prevent from producing controversial results with ethics concerns.

## REFERENCES

- Panos Achlioptas, Maks Ovsjanikov, Kilichbek Haydarov, Mohamed Elhoseiny, and Leonidas Guibas. ArtEmis: Affective Language for Visual Art. In *CVPR*, 2021.
- Sai Saketh Aluru, Binny Mathew, Punyajoy Saha, and Animesh Mukherjee. Deep Learning Models for Multilingual Hate Speech Detection. In *ECML-PKDD*, 2020.
- Joel Frank, Thorsten Eisenhofer, Lea Schönherr, Asja Fischer, Dorothea Kolossa, and Thorsten Holz. Leveraging Frequency Analysis for Deep Fake Image Recognition. In *ICML*, 2020.
- Xiaolei Huang, Linzi Xing, Franck Dernoncourt, and Michael J. Paul. Multilingual Twitter Corpus and Baselines for Evaluating Demographic Bias in Hate Speech Recognition. In *LREC*, 2020.

Please visit project website for more visualization results: <https://ai-sub.github.io/ldist/>

- Minyoung Huh, Andrew Liu, Andrew Owens, and Alexei A. Efros. Fighting Fake News: Image Splice Detection via Learned Self-Consistency. In *ECCV*, 2018.
- Bidisha Samanta, Niloy Ganguly, and Soumen Chakrabarti. Improved Sentiment Detection via Label Transfer from Monolingual to Synthetic Code-Switched Text. In *ACL*, 2019.
- Niloofer Safi Samghabadi, Parth Patwa, Srinivas PYKL, Prerana Mukherjee, Amitava Das, and Thamar Solorio. Aggression and Misogyny Detection using BERT: A Multi-Task Approach. In *LREC*, 2020.
- Sheng-Yu Wang, Oliver Wang, Richard Zhang, Andrew Owens, and Alexei A. Efros. CNN-Generated Images are Surprisingly Easy to Spot...for Now. In *CVPR*, 2020.
- Chenyun Wu, Mikayla Timm, and Subhansu Maji. Describing Textures using Natural Language. In *ECCV*, 2020.
